# Supplementary material for: Revealing the Complete Bispecific Phosphatase Genes (DUSPs) across the Genome and Investigating the Expression Patterns of GH_A11G3500 Resistance against Verticillium wilt
Source: MDPI journal article supplement (doi:10.3390/ijms25084500), 2024-04-19
Supplement: s1 [file s1]

**Table S1.** Identification data pertaining to the members of the DUSP gene family in cotton.

| Gene ID            | Gene Name       | Genomic Location              | Protein Length<br>(bp) | Molecular Weight<br>(Da) | Theoretical Isoelectric<br>Point<br>(pI) |
|--------------------|-----------------|-------------------------------|------------------------|--------------------------|------------------------------------------|
| Garb_01G029220.1   | <i>GaDUSP01</i> | Chr01:122,867,721-122,874,311 | 562                    | 62.09                    | 5.76                                     |
| Garb_02G010450.1   | <i>GaDUSP02</i> | Chr02:63,242,590-63,246,216   | 862                    | 95.66                    | 5.77                                     |
| Garb_03G003540.1   | <i>GaDUSP03</i> | Chr03:2,609,193-2,613,999     | 584                    | 64.43                    | 5.82                                     |
| Garb_03G009860.1   | <i>GaDUSP04</i> | Chr03:18,095,042-18,099,638   | 835                    | 91.83                    | 5.52                                     |
| Garb_04G002590.1   | <i>GaDUSP05</i> | Chr04:3,628,079-3,634,581     | 380                    | 43.10                    | 6.77                                     |
| Garb_04G007170.1   | <i>GaDUSP06</i> | Chr04:14,141,801-14,147,615   | 850                    | 94.08                    | 7.71                                     |
| Garb_05G027210.1   | <i>GaDUSP08</i> | Chr05:29,484,863-29,488,012   | 289                    | 33.11                    | 8.88                                     |
| Garb_05G000860.1   | <i>GaDUSP07</i> | Chr05:1,027,473-1,029,943     | 284                    | 31.93                    | 9.47                                     |
| Garb_06G004010.1   | <i>GaDUSP09</i> | Chr06:5,412,199-5,415,391     | 268                    | 29.96                    | 9.24                                     |
| Garb_06G019920.1   | <i>GaDUSP10</i> | Chr06:125,797,240-125,799,297 | 283                    | 31.89                    | 8.74                                     |
| Garb_06G019980.1   | <i>GaDUSP11</i> | Chr06:125,853,301-125,860,991 | 286                    | 33.41                    | 9.00                                     |
| Garb_07G005680.1   | <i>GaDUSP14</i> | Chr07:11,699,715-11,702,014   | 204                    | 23.32                    | 5.86                                     |
| Garb_07G001470.1   | <i>GaDUSP12</i> | Chr07:1,835,544-1,840,133     | 564                    | 63.15                    | 8.86                                     |
| Garb_07G019800.1   | <i>GaDUSP17</i> | Chr07:91,792,909-91,795,535   | 213                    | 24.45                    | 8.47                                     |
| Garb_07G009920.1   | <i>GaDUSP15</i> | Chr07:51,693,786-51,697,905   | 214                    | 24.51                    | 6.70                                     |
| Garb_07G019730.1   | <i>GaDUSP16</i> | Chr07:91,465,407-91,471,745   | 301                    | 33.62                    | 8.03                                     |
| Garb_07G005350.1   | <i>GaDUSP13</i> | Chr07:9,913,113-9,916,885     | 268                    | 29.79                    | 7.56                                     |
| Garb_08G016040.1   | <i>GaDUSP18</i> | Chr08:32,407,767-32,423,488   | 1211                   | 136.82                   | 6.16                                     |
| Garb_08G028990.1   | <i>GaDUSP19</i> | Chr08:137,528,557-137,539,928 | 1253                   | 140.99                   | 7.17                                     |
| Garb_09G029940.1   | <i>GaDUSP21</i> | Chr09:89,341,873-89,347,500   | 935                    | 104.10                   | 6.00                                     |
| Garb_09G024410.1   | <i>GaDUSP20</i> | Chr09:84,684,536-84,688,128   | 219                    | 24.97                    | 6.45                                     |
| Garb_10G027850.1   | <i>GaDUSP23</i> | Chr10:123,774,782-123,779,809 | 838                    | 93.20                    | 6.5                                      |
| Garb_10G001060.1   | <i>GaDUSP22</i> | Chr10:824,268-826,857         | 201                    | 22.81                    | 6.44                                     |
| Garb_11G017040.1   | <i>GaDUSP29</i> | Chr11:19,759,668-19,763,372   | 271                    | 30.23                    | 6.50                                     |
| Garb_11G005460.1   | <i>GaDUSP25</i> | Chr11:4,564,433-4,570,302     | 647                    | 71.29                    | 6.09                                     |
| Garb_11G011380.1   | <i>GaDUSP28</i> | Chr11:10,679,780-10,695,664   | 1255                   | 141.35                   | 6.14                                     |
| Garb_11G008400.1   | <i>GaDUSP27</i> | Chr11:7,192,982-7,196,091     | 314                    | 35.31                    | 5.93                                     |
| Garb_11G007890.1   | <i>GaDUSP26</i> | Chr11:6,751,666-6,754,764     | 448                    | 51.75                    | 8.53                                     |
| Garb_11G040720.1   | <i>GaDUSP30</i> | Chr11:134,410,353-134,415,804 | 364                    | 40.41                    | 6.04                                     |
| Garb_11G002830.1   | <i>GaDUSP24</i> | Chr11:2,388,661-2,391,293     | 333                    | 37.68                    | 6.26                                     |
| Garb_12G002410.1   | <i>GaDUSP31</i> | Chr12:3,209,340-3,215,620     | 618                    | 67.18                    | 5.79                                     |
| Garb_13G021030.1   | <i>GaDUSP32</i> | Chr13:115,824,908-115,827,338 | 201                    | 23.25                    | 7.56                                     |
| Gbar_A01G015500.1  | <i>GbDUSP01</i> | A01:94,311,099-94,315,503     | 862                    | 95.88                    | 5.76                                     |
| Gbar_A03G014990.1  | <i>GbDUSP02</i> | A03:88,370,923-88,375,352     | 835                    | 91.86                    | 5.52                                     |
| Gbar_A05G039650.3  | <i>GbDUSP06</i> | A05:99,190,595-99,197,143     | 380                    | 43.16                    | 6.53                                     |
| Gbar_A05G027510.1  | <i>GbDUSP04</i> | A05:30,378,789-30,382,046     | 257                    | 29.23                    | 8.46                                     |
| Gbar_A05G035700.7  | <i>GbDUSP05</i> | A05:89,681,064-89,686,978     | 850                    | 93.99                    | 7.93                                     |
| Gbar_A05G002500.2  | <i>GbDUSP03</i> | A05:2,294,698-2,297,685       | 290                    | 32.66                    | 9.39                                     |
| Gbar_A06G007170.1  | <i>GbDUSP07</i> | A06:15,791,657-15,793,786     | 283                    | 31.89                    | 8.74                                     |
| Gbar_A07G023420.1  | <i>GbDUSP10</i> | A07:91,038,480-91,043,185     | 572                    | 63.91                    | 8.84                                     |
| Gbar_A07G019960.1  | <i>GbDUSP09</i> | A07:83,658,744-83,663,102     | 268                    | 29.86                    | 7.57                                     |
| Gbar_A07G009100.1  | <i>GbDUSP08</i> | A07:14,009,753-14,018,900     | 265                    | 29.72                    | 6.99                                     |
| Gbar_A09G019830.3  | <i>GbDUSP11</i> | A09:71,931,759-71,938,578     | 932                    | 105.62                   | 5.79                                     |
| Gbar_A09G021150.1  | <i>GbDUSP13</i> | A09:73,182,949-73,186,649     | 219                    | 25.00                    | 6.45                                     |
| Gbar_A09G026570.3  | <i>GbDUSP14</i> | A09:77,812,657-77,818,804     | 935                    | 104.12                   | 6.05                                     |
| Gbar_A09G021140.14 | <i>GbDUSP12</i> | A09:73,173,571-73,176,090     | 206                    | 23.55                    | 9.17                                     |
| Gbar_A10G020920.1  | <i>GbDUSP16</i> | A10:100,207,985-100,210,453   | 138                    | 16.15                    | 9.78                                     |
| Gbar_A10G022730.1  | <i>GbDUSP17</i> | A10:104,555,887-104,558,718   | 843                    | 93.55                    | 6.63                                     |
| Gbar_A10G020810.2  | <i>GbDUSP15</i> | A10:99,928,853-99,942,122     | 959                    | 107.21                   | 5.34                                     |
| Gbar_A11G007900.1  | <i>GbDUSP19</i> | A11:6,895,513-6,898,680       | 314                    | 35.30                    | 5.93                                     |
| Gbar_A11G002370.1  | <i>GbDUSP18</i> | A11:1,995,428-1,998,475       | 333                    | 37.67                    | 6.26                                     |
| Gbar_A11G015770.1  | <i>GbDUSP20</i> | A11:18,139,879-18,144,005     | 271                    | 30.21                    | 6.65                                     |
| Gbar_A12G025220.2  | <i>GbDUSP21</i> | A12:98,915,995-98,923,036     | 960                    | 107.76                   | 5.66                                     |
| Gbar_D01G016790.2  | <i>GbDUSP22</i> | D01:50,560,215-50,564,663     | 863                    | 95.65                    | 5.79                                     |
| Gbar_D02G016880.1  | <i>GbDUSP23</i> | D02:55,269,200-55,273,296     | 835                    | 92.07                    | 5.62                                     |
| Gbar_D04G006430.1  | <i>GbDUSP25</i> | D04:10,241,534-10,245,034     | 851                    | 94.23                    | 7.74                                     |
| Gbar_D04G002260.3  | <i>GbDUSP24</i> | D04:3,019,344-3,025,906       | 376                    | 42.59                    | 6.53                                     |

|                   |          |                             |     |        |      |
|-------------------|----------|-----------------------------|-----|--------|------|
| Gbar_D05G028370.1 | GbDUSP28 | D05:27,630,811-27,634,460   | 289 | 33.02  | 8.99 |
| Gbar_D05G010380.2 | GbDUSP27 | D05:8,419,712-8,423,063     | 284 | 30.88  | 5.43 |
| Gbar_D05G002770.1 | GbDUSP26 | D05:2,414,582-2,417,320     | 284 | 32.12  | 9.41 |
| Gbar_D06G007410.1 | GbDUSP29 | D06:11,706,045-11,708,179   | 283 | 31.78  | 8.90 |
| Gbar_D07G024180.1 | GbDUSP32 | D07:54,743,829-54,748,506   | 573 | 64.16  | 8.89 |
| Gbar_D07G009500.1 | GbDUSP30 | D07:11,325,590-11,331,040   | 265 | 29.68  | 6.65 |
| Gbar_D07G020550.1 | GbDUSP31 | D07:48,257,475-48,261,900   | 264 | 29.35  | 6.65 |
| Gbar_D09G026140.2 | GbDUSP36 | D09:51,393,288-51,399,490   | 935 | 104.11 | 6.12 |
| Gbar_D09G020860.2 | GbDUSP34 | D09:47,194,153-47,198,205   | 196 | 22.48  | 8.97 |
| Gbar_D09G020870.1 | GbDUSP35 | D09:47,203,407-47,206,430   | 176 | 19.97  | 4.59 |
| Gbar_D09G019590.2 | GbDUSP33 | D09:45,998,962-46,005,703   | 932 | 105.49 | 6.03 |
| Gbar_D10G021090.1 | GbDUSP37 | D10:55,834,905-55,848,216   | 959 | 107.40 | 5.45 |
| Gbar_D10G023050.1 | GbDUSP38 | D10:59,464,545-59,467,373   | 842 | 93.72  | 6.23 |
| Gbar_D11G008330.2 | GbDUSP40 | D11:6,506,996-6,510,159     | 314 | 35.39  | 5.58 |
| Gbar_D11G002750.1 | GbDUSP39 | D11:2,153,917-2,156,826     | 333 | 37.65  | 6.26 |
| Gbar_D11G016570.1 | GbDUSP41 | D11:15,806,240-15,810,374   | 271 | 30.31  | 8.09 |
| Gbar_D12G025140.2 | GbDUSP42 | D12:55,920,499-55,930,034   | 960 | 107.51 | 5.71 |
| GH_A03G1540       | GhDUSP01 | A03:94,693,102-94,696,192   | 835 | 91.85  | 5.52 |
| GH_A05G0273       | GhDUSP02 | A05:2,635,062-2,636,743     | 284 | 31.92  | 9.39 |
| GH_A05G3715       | GhDUSP03 | A05:97,483,554-97,487,059   | 850 | 93.99  | 8.21 |
| GH_A05G4143       | GhDUSP04 | A05:107,427,955-107,434,224 | 378 | 42.87  | 6.77 |
| GH_A06G0743       | GhDUSP05 | A06:16,229,295-16,230,945   | 283 | 31.89  | 8.74 |
| GH_A07G2141       | GhDUSP07 | A07:87,676,806-87,680,577   | 268 | 29.91  | 7.56 |
| GH_A07G0942       | GhDUSP06 | A07:13,592,945-13,598,509   | 265 | 29.63  | 6.08 |
| GH_A09G2171       | GhDUSP08 | A09:78,560,777-78,564,044   | 219 | 24.94  | 6.71 |
| GH_A09G2699       | GhDUSP09 | A09:83,078,997-83,084,392   | 935 | 104.14 | 6.05 |
| GH_A10G2332       | GhDUSP10 | A10:109,975,880-109,978,711 | 843 | 93.56  | 6.50 |
| GH_A11G3500       | GhDUSP14 | A11:118,306,098-118,308,968 | 364 | 40.41  | 5.68 |
| GH_A11G0784       | GhDUSP12 | A11:6,964,216-6,966,230     | 314 | 35.30  | 5.93 |
| GH_A11G1592       | GhDUSP13 | A11:18,498,426-18,501,845   | 271 | 30.21  | 6.65 |
| GH_A11G0262       | GhDUSP11 | A11:2,292,765-2,294,462     | 333 | 37.68  | 6.26 |
| GH_D01G1827       | GhDUSP15 | D01:52,261,842-52,265,494   | 863 | 95.65  | 5.84 |
| GH_D04G0235       | GhDUSP16 | D04:3,217,493-3,223,761     | 374 | 42.36  | 6.53 |
| GH_D04G0631       | GhDUSP17 | D04:10,520,729-10,524,229   | 851 | 94.23  | 7.74 |
| GH_D05G2823       | GhDUSP19 | D05:27,117,549-27,120,710   | 289 | 33.02  | 8.99 |
| GH_D05G0277       | GhDUSP18 | D05:2,362,176-2,363,822     | 284 | 32.06  | 9.33 |
| GH_D06G0719       | GhDUSP21 | D06:11,938,249-11,939,899   | 283 | 31.81  | 8.53 |
| GH_D06G0537       | GhDUSP20 | D06:7,531,025-7,532,938     | 637 | 74.62  | 9.03 |
| GH_D07G0943       | GhDUSP22 | D07:10,878,251-10,882,610   | 265 | 29.69  | 6.70 |
| GH_D07G2079       | GhDUSP23 | D07:50,441,944-50,445,755   | 264 | 29.32  | 7.03 |
| GH_D09G2619       | GhDUSP24 | D09:51,895,766-51,901,170   | 935 | 104.11 | 6.12 |
| GH_D10G2426       | GhDUSP25 | D10:61,625,657-61,628,491   | 844 | 93.88  | 6.14 |
| GH_D11G3506       | GhDUSP29 | D11:68,214,494-68,217,381   | 364 | 40.36  | 5.79 |
| Grai_01G018320.1  | GrDUSP01 | Chr01:40,368,261-40,371,908 | 863 | 95.72  | 5.85 |
| Grai_03G019930.1  | GrDUSP02 | Chr03:50,769,381-50,773,843 | 832 | 91.53  | 5.44 |
| Grai_04G022070.1  | GrDUSP04 | Chr04:47,528,061-47,533,544 | 402 | 45.47  | 8.66 |
| Grai_04G017440.1  | GrDUSP03 | Chr04:40,613,521-40,619,334 | 851 | 94.20  | 7.18 |
| Grai_05G002900.1  | GrDUSP05 | Chr05:2,229,317-2,231,860   | 284 | 32.12  | 9.41 |
| Grai_05G029900.1  | GrDUSP06 | Chr05:25,831,231-25,834,375 | 289 | 32.98  | 8.88 |
| Grai_06G024140.1  | GrDUSP09 | Chr06:56,591,393-56,594,756 | 268 | 30.06  | 9.33 |
| Grai_06G024130.1  | GrDUSP08 | Chr06:56,567,355-56,571,062 | 268 | 29.99  | 9.24 |
| Grai_06G008210.1  | GrDUSP07 | Chr06:11,314,637-11,316,808 | 283 | 31.78  | 8.9  |
| Grai_07G005730.1  | GrDUSP10 | Chr07:8,073,067-8,077,391   | 264 | 29.35  | 7.03 |
| Grai_07G019420.1  | GrDUSP11 | Chr07:42,623,832-42,628,755 | 265 | 29.61  | 6.59 |
| Grai_09G029320.1  | GrDUSP12 | Chr09:49,833,934-49,840,220 | 876 | 97.60  | 6.07 |
| Grai_10G027350.1  | GrDUSP13 | Chr10:56,896,256-56,901,358 | 842 | 93.70  | 6.23 |
| Grai_11G002750.1  | GrDUSP14 | Chr11:2,633,331-2,638,880   | 364 | 40.32  | 5.68 |
| Grai_11G031300.1  | GrDUSP16 | Chr11:57,022,682-57,025,519 | 314 | 35.34  | 5.69 |
| Grai_11G023160.1  | GrDUSP15 | Chr11:48,405,951-48,409,723 | 271 | 30.25  | 7.58 |
| Grai_11G036870.1  | GrDUSP17 | Chr11:61,190,843-61,192,543 | 333 | 37.65  | 6.26 |
